# Supplementary material for: Insights into the Trypanosome-Host Interactions Revealed through Transcriptomic Analysis of Parasitized Tsetse Fly Salivary Glands
Source: PLoS Negl Trop Dis. 2014 Apr 24;8(4):e2649. doi: 10.1371/journal.pntd.0002649 (PMC3998935; doi:10.1371/journal.pntd.0002649)
Supplement: Table S1 — Contigs with enriched expression in the salivary glands (SG) compared to whole females [35] used for RNA-seq analysis comparing control SG and SG infected with trypanosomes. (XLSX) [file pntd.0002649.s002.xlsx]

## Sheet: Negative  vs. Positive (ab-...
Feature ID	Fold change	Kal's Z-test: Bonferroni	SG-infected RPKM	SG-control RPKM	Best Functional description	% Coverage	Best match to NR-LIGHT protein database	% Coverage	Match
ab-tri_asb-12805	21.7767	1.36329e-09	30.1763	650.36	Aromatic amino acid hydroxylase	98.2	pale, isoform B	100	gi|17136776
ab-tri_asb-24551	10.4122	0	13.2066	135.793	Unknown product		hypothetical protein SSAG_05897	90	gi|254386265
ab-tri_asb-17047	5.74747	1.33469e-10	128.881	734.106	tetraspanin family integral membrane protein	100	tetraspanin family integral membrane protein	100	gi|289739859
ab-tri_asb-25880	5.11224	0.000673623	9.83369	49.8795	signal transduction - cellular_component - molecular_function	94.4	thioredoxin binding protein tBP-2/VDUP1	100	gi|289741749
ab-tri_asb-18870	5.05769	1	5.26402	26.1878	Unknown product		T. brucei spp.-specific protein	79	gi|261331295
ab-tri_asb-8590	4.38462	0.0712144	9.1906	39.7162	Calponin	107.7	calponin	100	gi|289743711
ab-tri_asb-15058	4.34242	1.33469e-10	125.272	539.105	Gamma-glutamyl hydrolase	88.2	putative gamma-glutamyl hydrolase	100	gi|289743457
ab-tri_asb-6808	4.33138	7.62679e-11	34.2555	146.986	Synaptobrevin - integral to membrane - lumen formation open tracheal system - synaptic vesicle docking involved in exocytosis - synaptic vesicle -	85.5	synaptobrevin, isoform A	88	gi|17647971
ab-tri_asb-55675	4.18367	1.9067e-11	64.016	265.279	UDP-glucuronosyl and UDP-glucosyl transferase	99	UDP-glucuronosyl and UDP-glucosyl transferase	100	gi|289743737
ab-tri_asb-26293	4.18359	4.95741e-10	25.6948	106.654	Unknown product		SJCHGC01974 protein	48	gi|56757374
ab-tri_asb-8077	4.17188	1.01768e-06	19.2702	79.7104	protein kinase TKL grouptyrosine kinase-like protein - kinase - protein phosphorylation - ATP binding - protein kinase - cellular_component	3.7	hypothetical protein BRAFLDRAFT_67980	5	gi|260824533
ab-tri_asb-2153	4.12264	1.6409e-07	21.3217	86.9877	Glucosamine 6-phosphate synthetases contain amidotransferase and phosphosugar isomerase	36.4	Glutamine:fructose-6-phosphate aminotransferase 1, isoform D	36	gi|62862022
ab-tri_asb-50905	3.93458	0.0904228	10.7123	41.9164	Peroxisomal biogenesis protein (peroxin)	97	CG13827	99	gi|28571837
ab-tri_asb-56282	3.91168	0	35.2927	136.72	Glucosamine 6-phosphate synthetases contain amidotransferase and phosphosugar isomerase	67.1	Glutamine:fructose-6-phosphate aminotransferase 1, isoform H	69	gi|161076243
ab-tri_asb-26764	3.62846	1.33469e-10	50.7849	182.745	Cyclophilin 1 - microtubule associated complex - salivary gland cell autophagic cell death - autophagic cell death - cyclin-dependent protein kinase	88.9	cyclophilin type peptidyl-prolyl cis-trans isomerase	100	gi|289740535
ab-tri_asb-7638	3.56949	1.25842e-09	355.596	1257.89	Fibrillins	89.9	CG10650	93	gi|23397621
ab-tri_asb-56473	3.50323	0.0128763	15.5226	54.0194	Ribose-phosphate pyrophosphokinase	109.4	phosphoribosylpyrophosphate synthetase-associated protein	100	gi|289739617
ab-tri_asb-2682	3.47587	6.95944e-10	439.289	1513.14	hypothetical conserved protein	100	hypothetical conserved protein	100	gi|289742387
ab-tri_asb-16340	3.34211	1	7.68	25.3225	Unknown product		predicted protein	97	gi|297850648
ab-tri_asb-14498	3.20961	0.000478647	22.992	73.1632	Metal transporter CNNM2	68.3	unextended, isoform E	99	gi|281366731
ab-tri_asb-56723	3.06373	1.20122e-09	682.422	2072.06	Glossina morsitans morsitans 16S ribosomal RNA gene mitochondrial gene for mitochondrial RNA partial sequence	10	conserved Plasmodium membrane protein, unknown function	9	gi|296005371
ab-tri_asb-1550	3.0605	0	59.7853	181.244	Calmodulin	97.3	troponin C 47D	100	gi|289742389
ab-tri_asb-38697	3.02837	6.2921e-10	616.183	1849.17	GJ20134	100	CG6579	93	gi|221474780
ab-tri_asb-16814	2.95395	0.816662	15.2516	44.7275	transmembrane transporter - integral to membrane - transmembrane transport	42.6	CG8008, isoform B	39	gi|221330082
ab-tri_asb-27505	2.91329	0.306506	17.3543	50.142	Unknown product		CG13737, isoform A	83	gi|24663930
ab-tri_asb-7217	2.85848	1.33469e-10	96.5776	273.453	Uncharacterized protein - inner ear receptor cell differentiation - equilibrioception - sensory perception of light stimulus - photoreceptor cell	111	sans ortholog, isoform A	100	gi|20129939
ab-tri_asb-5978	2.84783	1	4.60893	12.996	ADP-ribosylation factor GTPase activator	108.8	GTPase-activating protein 69C	99	gi|24663283
ab-tri_asb-10848	2.81773	0.113454	20.3535	56.9614	extra bases - axon - translation initiation factor binding - neuronal cell body - negative regulation of translation - oogenesis - axon midline	12.3	eukaryotic initiation factor 5C	12	gi|289739629
ab-tri_asb-1117	2.77465	1	7.16899	19.605	Unknown product		T-cell receptor beta chain ANA 11	95	gi|170592076
ab-tri_asb-2523	2.75573	0.00851151	26.2992	71.8776	aluminum tubes isoform G	109.2	aluminum tubes, isoform G	99	gi|21358555
ab-tri_asb-36957	2.67901	1	16.2534	43.1614	Uncharacterized protein - unfolded protein binding - protein folding - endoplasmic reticulum - calcium ion binding	49.5	calreticulin	95	gi|207083709
ab-tri_asb-14282	2.6385	0.351067	21.3875	55.9199	Unknown product		conserved Plasmodium protein, unknown function	5	gi|296005375
ab-tri_asb-19788	2.62661	0.144941	23.3563	60.8995	transmembrane transporter - integral to membrane - transmembrane transport	49.5	CG8008, isoform B	42	gi|221330082
ab-tri_asb-3724	2.61696	0.000917738	34.3435	89.0805	Synaptic vesicle transporter SVOP	83	MIP13952p	66	gi|284427153
ab-tri_asb-14152	2.60262	0.218768	22.9702	59.3636	Unknown product		hypothetical secreted peptide precursor	55	gi|289743881
ab-tri_asb-2497	2.6007	2.98779e-08	57.3963	147.812	Adenylate/guanylate cyclase	67.9	adenylyl cyclase 76E	97	gi|3694982
ab-tri_asb-7798	2.54545	1	1.13727	2.80269	E.coli 23S ribosomal RNA (approx 80%) fragment A	15	hypothetical protein HMPREF0485_05014	100	gi|290513257
ab-tri_asb-9120	2.50577	9.07535e-05	43.4471	107.964	hypothetical conserved protein	100	hypothetical conserved protein	100	gi|289740881
ab-tri_asb-15606	2.49782	0.614572	22.9613	56.8982	Unknown product		conserved Plasmodium protein, unknown function	33	gi|124512020
ab-tri_asb-55769	2.48889	0.118241	27.1652	66.9462	Golgi microtubule-associated protein - cis-Golgi network - protein targeting to Golgi	76.4	golgi microtubule-associated protein, isoform A	90	gi|28571201
ab-tri_asb-730	2.46296	1	10.873	26.4835	Formin Homology 2 Domain	105.5	dishevelled associated activator of morphogenesis, isoform D	99	gi|320541621
ab-tri_asb-10430	2.43018	0.000217492	44.5967	107.462	Aminoglycoside phosphotransferase domain-containing protein 1 - kinase - cytoplasm	97	CG31751, isoform A	100	gi|24585008
ab-tri_asb-36572	2.31262	0.000141695	51.7073	118.602	GABA receptor	106.3	CG7589	98	gi|45550641
ab-tri_asb-22813	2.30877	0.498938	28.6374	65.4773	Gamma-glutamyl hydrolase	98.2	gamma-glutamyl hydrolase	100	gi|289740653
ab-tri_asb-30120	2.30179	3.89604e-05	56.2461	128.276	Unknown product		Pb-fam-2 protein	22	gi|68068325
ab-tri_asb-28477	2.2956	1	15.9885	36.3392	Unknown product		mCG133494, isoform CRA_a	11	gi|148685682
ab-tri_asb-8973	2.25581	1	4.31313	9.61469	Drosophila persimilis ribosomal RNA (Dper\28SrRNA:GL28069) rRNA	1.9	putative LysR family regulatory protein	34	gi|229589137
ab-tri_asb-27480	2.25352	1	7.16072	15.8822	Unknown product		hypothetical protein	6	gi|83315508
ab-tri_asb-56533	2.2259	0.0969487	36.4191	80.4739	Unknown product		conserved Plasmodium protein, unknown function	1	gi|296005486
ab-tri_asb-50927	2.22078	1	23.2371	51.115	GTP-binding protein SEC4 small G protein superfamily	93.7	Rab protein 5	100	gi|289743331
ab-tri_asb-5547	2.21698	0.0170269	42.6238	93.5573	GF16720	87.1	CG6688	76	gi|24649175
ab-tri_asb-2925	2.20455	1	8.8415	19.2716	Na + -driven anion exchanger 1 - inorganic anion exchanger - sodium:bicarbonate symporter - plasma membrane - chloride transport - sodium ion	9.1	Na	9	gi|221473363
ab-tri_asb-25316	2.19149	1	4.70584	10.2861	Unknown product		actin filament-associated protein 1-like	3	gi|189525987
ab-tri_asb-1751	2.18561	1	26.5388	57.4881	zinc ion binding - intracellular - potassium channel regulator	103.6	CG11984, isoform D	100	gi|281361403
ab-tri_asb-2222	2.18182	1	13.2644	28.7113	Forkhead/HNF-3-related transcription factor	113	fork head, isoform A	100	gi|17738265
ab-tri_asb-29929	2.17474	1.52536e-10	205.231	442.304	Synaptic vesicle transporter SVOP	100	CG8925, isoform A	83	gi|24647367
ab-tri_asb-9877	2.15534	1	31.0333	66.2526	Unknown product		NLI interacting factor	11	gi|83286266
ab-tri_asb-6587	2.11111	1	4.53609	9.43565	Membrane dipeptidase	106.3	CG42750	35	gi|320545194
ab-tri_asb-45822	2.09434	1	10.6792	22.1071	Unknown product		hypothetical protein	6	gi|83315800
ab-tri_asb-20370	2.06673	0	421.478	863.257	Zinc transporter	91.8	Fe2+/Zn2+ regulated transporter	100	gi|289740897
ab-tri_asb-13073	2.01869	1	21.5031	42.9787	Unknown product		conserved Plasmodium protein	6	gi|124804348
ab-tri_asb-20802	2.01852	1	5.38112	10.881	Unknown product		hypothetical protein LOC100503367	53	gi|309270005
ab-tri_asb-56110	2.01232	0.0128359	57.1062	113.762	Misexpression suppressor of ras 3	96	Misexpression suppressor of ras 3	96	gi|11066119
ab-tri_asb-14966	1.98185	0.00934215	60.8611	119.593	Dichaete - sequence-specific DNA binding - regulation of transcription from RNA polymerase II promoter - negative regulation of transcription from	105.7	AT02631p	100	gi|21429704
ab-tri_asb-31711	1.96753	2.86005e-11	711.524	1387.35	salivary secreted protein	100	putative salivary secreted protein	100	gi|289740329
ab-tri_asb-54009	1.95745	1	14.1488	27.5178	Drosophila persimilis ribosomal RNA (Dper\28SrRNA:GL28069) rRNA	4.3	unspecific monooxygenase	78	gi|170576227
ab-tri_asb-14569	1.94702	0.0203786	60.6445	117.046	golgi microtubule-associated protein isoform B	32	golgi microtubule-associated protein, isoform B	75	gi|28571203
ab-tri_asb-9050	1.9164	0.0256369	62.4494	118.701	Fatty acid desaturase	90.6	fatty acid desaturase	100	gi|289740765
ab-tri_asb-8722	1.90955	1	20.0376	37.8346	Unknown product		hypothetical protein	24	gi|71744952
ab-tri_asb-10256	1.88975	0.374314	51.926	97.229	Predicted membrane protein	98.3	CG10470	100	gi|24585112
ab-tri_asb-19588	1.871	0.00015778	94.1849	174.663	Glossina morsitans morsitans 16S ribosomal RNA gene mitochondrial gene for mitochondrial RNA partial sequence	2.7	hepatocellular carcinoma-associated antigen	10	gi|170061903
ab-tri_asb-14218	1.86364	1	4.39606	8.14694	Unknown product		hypothetical protein	10	gi|289724737
ab-tri_asb-11702	1.85714	1	17.6042	32.3043	Unknown product		hypothetical protein	2	gi|156094071
ab-tri_asb-2812	1.82911	1	31.7304	57.4975	cytochrome b5	100	cytochrome b5	100	gi|289740673
ab-tri_asb-17464	1.81951	1	20.5488	37.1625	Unknown product		conserved hypothetical protein	27	gi|170048114
ab-tri_asb-7861	1.81886	1	40.4448	72.9734	C-4 sterol methyl oxidase	97.8	CG1998, isoform A	77	gi|18859821
ab-tri_asb-31168	1.81349	1	25.337	45.5006	serotonin receptor 2	49.5	serotonin receptor 2	50	gi|289812788
ab-tri_asb-34851	1.80851	1	14.2094	25.4082	Serotonin receptor 2 - G-protein coupled receptor signaling pathway - G-protein coupled amine receptor - Gq/11-coupled serotonin receptor -	7.8	MIP06036p	15	gi|223976009
ab-tri_asb-14827	1.8046	1	8.75696	15.6329	Unknown product		transformation/transcription domain-associated protein-like	1	gi|345480161
ab-tri_asb-8756	1.80263	1	7.61475	13.6723	Unknown product		cbb3-type cytochrome c oxidase subunit I	12	gi|77458737
ab-tri_asb-57928	1.78191	1	18.838	33.3719	Synaptic vesicle transporter SVOP	106.1	CG6356	99	gi|24649622
ab-tri_asb-20087	1.78146	1	15.1673	26.7996	Unknown product		hypothetical protein, unlikely	30	gi|261329329
ab-tri_asb-57321	1.73529	1	6.84381	11.7295	Unknown product		Sox21b	14	gi|21357781
ab-tri_asb-28966	1.73525	0.552399	66.4409	114.177	Unknown product		conserved Plasmodium protein	3	gi|258597507
ab-tri_asb-10514	1.72826	1	27.6901	47.5207	GK24764	58.1	CG13243	91	gi|28574212
ab-tri_asb-12735	1.72689	1	47.7652	81.8689	Vesicle coat complex COPII subunit SEC23	103	vesicle coat complex COPII subunit SEC23	98	gi|289743311
ab-tri_asb-1126	1.71406	1	62.851	106.781	Unknown product		unnamed protein product	36	gi|194389890
ab-tri_asb-39852	1.71014	1	6.96576	11.7713	Unknown product		SJCHGC01974 protein	76	gi|56757374
ab-tri_asb-12724	1.70284	1	38.8776	65.6492	comm3 - autophagic cell death - salivary gland cell autophagic cell death	75.8	comm3, isoform D	74	gi|28574903
ab-tri_asb-54628	1.70197	6.5781e-10	1036.73	1748.65	mediator complex subunit 26 - mediator complex - transcription initiation from RNA polymerase II promoter	24.1	hypothetical conserved protein	100	gi|289743227
ab-tri_asb-584	1.67683	1	16.4639	27.3637	Lysosomal trafficking regulator LYST	94.5	CG6734	100	gi|24583787
ab-tri_asb-11540	1.67606	1	7.16153	11.8248	Glucose dehydrogenase/choline dehydrogenase/mandelonitrile lyase (GMC oxidoreductase family)	91.8	CG6142	94	gi|24650267
ab-tri_asb-6833	1.67466	7.38845e-08	196.981	326.873	Uncharacterized protein - death domain binding - negative regulation of transcription DNA-dependent - cellular response to amino acid starvation -	96.1	death-associated protein 1	100	gi|289740609
ab-tri_asb-5989	1.66964	1	11.2916	18.6212	Unknown product		similar to SET domain and mariner transposase fusion	26	gi|221109126
ab-tri_asb-2264	1.66754	1	38.3523	63.43	Sulfate/bicarbonate/oxalate exchanger SAT-1	93.3	CG5002	99	gi|19922482
ab-tri_asb-20051	1.64516	1	9.3751	15.2335	Unknown product		NADH dehydrogenase subunit 6	47	gi|295856811
ab-tri_asb-22820	1.64391	2.25249e-05	163.286	266.119	salivary serine protease	100	salivary serine protease	100	gi|289742867
ab-tri_asb-55759	1.63483	1	35.7504	57.9474	comm3 - autophagic cell death - salivary gland cell autophagic cell death	21.2	comm2	96	gi|28574901
ab-tri_asb-10057	1.63197	1	54.0592	87.4136	anti-apoptotic BCl-2 family protein	90.5	anti-apoptotic BCl-2 family protein	91	gi|289740445
ab-tri_asb-56421	1.63043	0	3328.54	5378.26	Knottins	62.2	defensin	93	gi|149728143
ab-tri_asb-25281	1.628	0.000343927	146.402	236.17	Acetylcholinesterase/Butyrylcholinesterase	90.3	esterase Q	98	gi|21358071
ab-tri_asb-56688	1.62536	1	34.8419	56.1162	COPII vesicle protein	97.8	cOPII vesicle protein	100	gi|289741661
ab-tri_asb-21946	1.61905	1	23.1802	37.2294	Ion channel regulatory protein UNC-93	100	CG18549	100	gi|45550746
ab-tri_asb-56337	1.61719	1	25.6844	41.1789	transposase	33.7	transposase	52	gi|26986659
ab-tri_asb-723	1.61671	1	34.8766	55.7972	Gamma-tubulin ring complex protein	107.9	CG7456	100	gi|19921094
ab-tri_asb-26409	1.6	1	27.145	42.9725	dolichyl-phosphate beta-glucosyltransferase	100	dolichyl-phosphate beta-glucosyltransferase	100	gi|289742247
ab-tri_asb-9394	1.59627	1	32.3218	51.1269	Unknown product		hypothetical protein, conserved in Plasmodium species	2	gi|221060628
ab-tri_asb-38209	1.59478	0.684963	88.4503	139.903	Unknown product		undecaprenylphosphate glucosephosphotransferase WchA (initial sugar transferase)	13	gi|68642627
ab-tri_asb-388	1.5889	1	70.6268	111.244	Lipid phosphate phosphatase	96.8	lipid phosphate phosphatase	100	gi|289740455
ab-tri_asb-17612	1.58723	1	23.6337	37.1078	Predicted UDP-galactose transporter	94.7	putative UDP-galactose transporter	100	gi|289741051
ab-tri_asb-56741	1.5834	0	32358.4	50775.5	thrombin inhibitor TTI=antithrombotic peptide {N-terminal}	100	Tsetse thrombin inhibitor; Flags: Precursor gi|3929543|gb|AAC79986.1| tsetse	100	gi|74834603
ab-tri_asb-23222	1.58163	1	9.86144	15.4565	Unknown product		conserved Plasmodium protein, unknown function	3	gi|124505325
ab-tri_asb-5305	1.56395	1	17.2409	26.7663	Lactate dehydrogenase	100	lactate dehydrogenase	100	gi|289740453
ab-tri_asb-36270	1.54848	0.383923	105.645	162.205	UDP-glucuronosyl and UDP-glucosyl transferase	96.5	MIP21412p	97	gi|296531482
ab-tri_asb-15228	1.54268	0	5401.08	8257.2	salivary secreted peptide	100	putative salivary secreted peptide	100	gi|289740193
ab-tri_asb-55112	1.5392	0.535106	105.1	160.303	Arthropod defensin	102.9	similar to defensin 1	30	gi|91090342
ab-tri_asb-35998	1.53472	1	14.4546	21.9957	Unknown product		super cysteine rich protein	67	gi|1480863
ab-tri_asb-1248	1.5303	1	66.2963	100.525	GJ15461	45.8	CG14960	76	gi|24656673
ab-tri_asb-28056	1.52707	1	35.3081	53.3821	Permease of the major facilitator superfamily	102.5	CG4330	93	gi|24641682
ab-tri_asb-57717	1.51835	1	43.8318	65.8536	Unknown product		PDZ and LIM domain protein 7	11	gi|347800657
ab-tri_asb-21207	1.51724	1	2.95528	4.36981	Unknown product		hypothetical protein EschWDRAFT_4351	68	gi|307315068
ab-tri_asb-23653	1.51515	1	9.94705	14.9708	Unknown product		zinc finger protein transcription factor lame duck, putative	4	gi|242017859
ab-tri_asb-56378	1.51123	0.426143	116.35	174.181	Myosin class II heavy chain	26	putative trypanosomal transcript	100	gi|289724650
ab-tri_asb-42590	1.50526	1	9.50935	14.2155	Unknown product		conserved hypothetical protein	12	gi|295840005
ab-tri_asb-1976	1.50501	4.76674e-11	551.617	822.648	Aquaporin (major intrinsic protein family)	93	aquaporin	100	gi|289742607
ab-tri_asb-37939	1.50279	1	71.9322	107.133	Unknown product		ATP-binding cassette sub-family A member 12	2	gi|326670776
ab-tri_asb-3076	1.4921	1	89.0056	131.568	signal peptide protease	100	signal peptide protease	100	gi|289740747
ab-tri_asb-4578	1.48766	4.93242e-06	264.453	389.951	glutathione S-transferase	100	glutathione S-transferase	100	gi|289741899
ab-tri_asb-5993	1.48731	0.963496	114.843	169.194	Sorbitol dehydrogenase	100	sorbitol dehydrogenase	100	gi|289741353
ab-tri_asb-17274	1.48632	9.46809e-07	286.264	421.689	membrane protein	100	putative membrane protein	100	gi|289743905
ab-tri_asb-6834	1.48201	1	27.9218	41.0615	Uncharacterized protein - death domain binding - negative regulation of transcription DNA-dependent - cellular response to amino acid starvation -	38.4	death-associated protein 1	100	gi|289740609
ab-tri_asb-13937	1.48131	1	21.5356	31.5558	DNA/RNA non-specific endonuclease	108	CG14118	92	gi|24663560
ab-tri_asb-31712	1.47594	1	37.5498	54.9042	hypothetical conserved protein	100	hypothetical conserved protein	100	gi|289724619
ab-tri_asb-22497	1.47323	1.46816e-09	382.742	558.813	hypothetical conserved protein	100	hypothetical conserved protein	100	gi|289739839
ab-tri_asb-5470	1.45492	1	24.5564	35.3506	Unknown product		protein DBF4 homolog A isoform 2	13	gi|300192925
ab-tri_asb-2277	1.45411	1	41.5566	59.9391	abhydrolase domain containing 12 - acylglycerol lipase - hydrolase - integral to membrane - membrane	103.1	putative alpha/beta hydrolase	97	gi|289740983
ab-tri_asb-26712	1.43709	1	92.6322	131.912	Unknown product		conserved Plasmodium protein, unknown function	31	gi|124506773
ab-tri_asb-12	1.43529	1	25.5791	36.4175	Na + /H + hydrogen antiporter 2	50.6	Na	51	gi|24649169
ab-tri_asb-57918	1.42627	1	43.5803	61.6381	Tektin A - microtubule cytoskeleton organization - microtubule - microtubule-based process - microtubule binding - microtubule associated complex	21	tektin A	85	gi|17737425
ab-tri_asb-54736	1.42562	0.0172476	199.19	281.387	5' nucleotidase	97.6	CG30104, isoform A	97	gi|19922446
ab-tri_asb-33316	1.42	1	10.034	14.1623	Unknown product		immunoglobulin gamma 1 heavy chain variable region	43	gi|304562608
ab-tri_asb-34471	1.41286	0.00128315	248.398	347.861	Unknown product		predicted protein	96	gi|297832456
ab-tri_asb-21414	1.4094	1	14.9737	20.9547	reverse transcriptase	11.7	reverse transcriptase	12	gi|28569864
ab-tri_asb-9462	1.40909	1	8.82141	12.329	Unknown product		putative O-antigen polymerase	29	gi|77737734
ab-tri_asb-8334	1.39884	1	17.3376	24.043	Unknown product		hypothetical protein SSAG_06535	92	gi|254386939
ab-tri_asb-14672	1.38261	1	23.1506	31.6269	Unknown product		AGAP003439-PI	11	gi|119112351
ab-tri_asb-20642	1.38095	1	33.7732	46.1898	Predicted E3 ubiquitin ligase	90.9	CG32369, isoform A	96	gi|24660416
ab-tri_asb-25636	1.33645	1	32.2856	42.6703	Protein-tyrosine sulfotransferase	105.6	transport and golgi organization 13, isoform B	99	gi|24641809
ab-tri_asb-31309	1.32174	1	11.5875	15.1719	Unknown product		hypothetical protein LOC553492	3	gi|189519312
ab-tri_asb-28287	1.3125	1	4.7951	6.27662	Unknown product		hypothetical protein, partial	29	gi|221105736
ab-tri_asb-35258	1.30435	1	34.7013	44.7501	Sulfate/bicarbonate/oxalate exchanger SAT-1	98	CG9717	97	gi|21358229
ab-tri_asb-23745	1.29231	1	6.56357	8.35383	Unknown product		hypothetical protein DAPPUDRAFT_8207	44	gi|321455635
ab-tri_asb-56632	1.29027	0.0144242	343.687	439.419	Eukaryotic cytochrome b561	101.4	CG13077	96	gi|19921552
ab-tri_asb-15456	1.28395	1	48.8417	62.1356	HMG-box transcription factor	103.3	SoxNeuro	100	gi|17975569
ab-tri_asb-25091	1.25758	1	79.5439	99.157	hypothetical secreted peptide precursor	100	hypothetical secreted peptide precursor	100	gi|289743783
ab-tri_asb-21258	1.25581	1	60.4907	75.2365	Unknown product		similar to DNA-directed RNA polymerase, omega subunit family protein	2	gi|221129496
ab-tri_asb-57422	1.25352	1	49.9185	62.0365	Proctolin receptor - G-protein coupled peptide receptor - proctolin receptor - neuropeptide receptor - integral to membrane - G-protein coupled	50	proctolin receptor (CG6986) - fruit fly (Drosophila melanogaster)	88	gi|60729632
ab-tri_asb-3028	1.24014	1	58.5485	71.9997	dipeptidyl aminopeptidase	100	dipeptidyl aminopeptidase	100	gi|289743583
ab-tri_asb-33511	1.23301	1	10.3802	12.6326	Unknown product		hypothetical protein	53	gi|70927938
ab-tri_asb-22639	1.23214	1	5.59638	6.85066	Phosphoenolpyruvate carboxykinase	95.4	CG10924, isoform A	95	gi|24655082
ab-tri_asb-11573	1.22957	0	10763.1	13115	angiopoietin-like salivary protein	100	angiopoietin-like salivary protein	100	gi|289741307
ab-tri_asb-56395	1.22917	1	9.65039	11.7484	Uncharacterized conserved protein	85.2	CG30497, isoform A	97	gi|23308611
ab-tri_asb-10790	1.21573	1	183.926	221.582	NADP-dependent flavoprotein reductase	117.4	nitric oxide synthase	65	gi|6707649
ab-tri_asb-3330	1.21293	1	63.6366	76.5188	inward rectifier K+ channel	95.2	inward rectifier K+ channel	95	gi|289742199
ab-tri_asb-33068	1.20588	1	20.4675	24.5177	Unknown product		hypothetical protein HMPREF9682_01529	7	gi|355364199
ab-tri_asb-10924	1.19474	1	133.648	158.23	salivary nitric oxide synthase	100.2	salivary nitric oxide synthase	100	gi|289739395
ab-tri_asb-21027	1.18973	1	115.424	136.068	Unknown product		hypothetical secreted peptide precursor	34	gi|289743785
ab-tri_asb-57266	1.18033	1	6.11382	7.12255	cytoskeleton - cytoskeletal protein binding - actin binding	15.5	IP17263p	75	gi|157816480
ab-tri_asb-1694	1.17647	1	5.15613	5.99927	Unknown product		CG10026, isoform A	6	gi|24585230
ab-tri_asb-33482	1.17257	2.47871e-10	8533.33	9916.06	salivary secreted peptide	100	putative salivary secreted peptide	100	gi|289742159
ab-tri_asb-8745	1.17045	1	8.7965	10.2301	Unknown product		PitB	15	gi|345523280
ab-tri_asb-23304	1.16667	1	13.2408	15.3512	Unknown product		CG11122	45	gi|45549358
ab-tri_asb-25404	1.16216	1	3.69951	4.2475	Unknown product		motor neuron homeobox	9	gi|260794346
ab-tri_asb-2483	1.16016	1	51.467	59.0899	eyegone - eye-antennal disc development - compound eye development - antennal development - notum development - sequence-specific DNA binding -	105	AT09010p	99	gi|60678223
ab-tri_asb-12723	1.15873	1	44.2594	50.8814	comm3 - autophagic cell death - salivary gland cell autophagic cell death	47	comm3, isoform C	72	gi|221331196
ab-tri_asb-32339	1.15844	1	87.5275	100.475	dopamine N-acetyltransferase	100	dopamine N-acetyltransferase	100	gi|289739631
ab-tri_asb-9688	1.15521	1	84.7312	97.0744	thioredoxin peroxidase 2	100	alkyl hydroperoxide reductase	100	gi|289740625
ab-tri_asb-25034	1.15046	1.33469e-10	2375.39	2708.18	Insect antimicrobial peptide	97.6	CEC-A	100	gi|156535920
ab-tri_asb-3208	1.14103	1	23.4832	26.5465	transposase	58.2	similar to hemicentin 1, partial	5	gi|221091136
ab-tri_asb-27804	1.125	1	4.8381	5.36537	Unknown product		hypothetical protein	16	gi|71409643
ab-tri_asb-56176	1.12128	1	43.9069	48.816	histone-like transcription factor - nucleus - DNA binding - sequence-specific DNA binding - intracellular - biological_process -	22.9	Lipase, putative	24	gi|124808847
ab-tri_asb-4787	1.12069	1	23.2848	25.8969	Unknown product		hypothetical protein LOC100503367, partial	50	gi|309262927
ab-tri_asb-26498	1.10959	1	21.9984	24.1411	Unknown product		hypothetical protein, conserved in Plasmodium species	18	gi|221055902
ab-tri_asb-19928	1.10494	1	16.2306	17.8599	Unknown product		26S proteasome regulatory complex subunit	5	gi|70946144
ab-tri_asb-10042	1.10355	1	101.878	111.35	Unknown product		similar to MGC86278 protein	11	gi|115752466
ab-tri_asb-5977	1.10056	1	17.9731	19.6337	ADP-ribosylation factor GTPase activator	110.3	GTPase-activating protein 69C	100	gi|24663283
ab-tri_asb-57318	1.09259	1	5.46361	5.83465	Unknown product		hypothetical protein	12	gi|256072773
ab-tri_asb-15105	1.09023	1	13.3676	14.4398	Unknown product		hypothetical protein	88	gi|83314473
ab-tri_asb-21676	1.0708	1	22.6885	24.1312	Possible membrane-associated motif in LPS-induced tumor necrosis factor alpha factor	101.4	CG42566	97	gi|281364035
ab-tri_asb-39254	1.06667	1	7.52935	7.98688	Unknown product		Ser/Thr protein kinase	18	gi|221053055
ab-tri_asb-18565	1.03509	1	5.758	5.8534	Unknown product		SJCHGC07766 protein	82	gi|76157619
ab-tri_asb-6696	1.01502	1	33.4372	33.6356	Unknown product		RalBP1-associated Eps domain-containing protein, putative	10	gi|242018231
ab-tri_asb-31197	1.00324	1	31.0884	30.8797	Unknown product		putative glycosyltransferase CpsIVJ	13	gi|13876780
ab-tri_asb-12799	-1	1	6.92554	6.82694	Unknown product		leucine-rich repeat-containing protein 68-like	7	gi|193596637
ab-tri_asb-20245	-1	1	7.83633	7.77878	Unknown product		Intermediate Filament, C family member (ifc-2)	7	gi|25150018
ab-tri_asb-36045	-1.0099	1	102.502	100.506	hypothetical secreted peptide precursor	63.8	hypothetical secreted peptide precursor	64	gi|289743887
ab-tri_asb-24285	-1.02222	1	9.25617	8.91935	Unknown product		DNA mismatch repair protein, putative	6	gi|124808081
ab-tri_asb-18381	-1.02469	1	8.32367	8.09277	Unknown product		mCG148354	18	gi|148706989
ab-tri_asb-20556	-1.0581	1	60.4078	56.5088	Calcium-transporting ATPase type 2C member 1	98.4	secretory pathway calcium atpase, isoform B	100	gi|24668696
ab-tri_asb-19527	-1.07216	1	20.8694	19.3621	Unknown product		conserved Plasmodium protein, unknown function	14	gi|124511860
ab-tri_asb-57917	-1.09	1	10.9667	9.9231	Unknown product		hypothetical protein	9	gi|156102751
ab-tri_asb-6838	-1.11574	1	24.2474	21.4947	GH19178	6.9	homeobox protein NK7.1	18	gi|2996042
ab-tri_asb-52331	-1.13623	1	1545.78	1348.19	Tsal2 form B	9.5	Tsal2 protein precursor	10	gi|289740591
ab-tri_asb-12346	-1.13853	1	26.3812	23.0371	CREB/ATF family transcription factor	131.1	Cyclic-AMP response element binding protein A, isoform A	100	gi|45549204
ab-tri_asb-1322	-1.15152	1	91.6238	78.8296	Unknown product		hypothetical protein LOC100504165	41	gi|309272546
ab-tri_asb-16712	-1.18033	1	7.24295	6.08037	hypothetical secreted peptide precursor	76.1	hypothetical secreted peptide precursor	76	gi|289743875
ab-tri_asb-34451	-1.18239	1	18.8376	15.8091	Unknown product		hypothetical protein, unlikely	25	gi|340052234
ab-tri_asb-50454	-1.1987	0	37585.3	31073.3	salivary secreted peptide	100	putative salivary secreted peptide	100	gi|289743543
ab-tri_asb-33340	-1.22839	1	3241.14	2614.8	hypothetical secreted peptide precursor	100	hypothetical secreted peptide precursor	100	gi|289744025
ab-tri_asb-17241	-1.23585	1	26.2709	21.0827	Unknown product		hypothetical protein	3	gi|82540360
ab-tri_asb-1137	-1.2359	1	24.1725	19.461	Unknown product		similar to glucose transporter 3	21	gi|91082971
ab-tri_asb-25215	-1.28902	1	22.3945	17.225	phospholipase D1 - phospholipid metabolic process - plasma membrane - phospholipase D	4.8	super cysteine rich protein	72	gi|1480863
ab-tri_asb-30329	-1.29355	1	161.122	123.487	Synaptic vesicle transporter SVOP	91.9	CG3168, isoform A	93	gi|24640196
ab-tri_asb-17548	-1.29465	1	99.7441	76.393	Amino acid transporters	99.5	amino acid transporter protein	100	gi|289739535
ab-tri_asb-16468	-1.31579	1	15.062	11.3946	BTB/POZ domain-containing proteincoagulation factor 5/8 type C-terminal domain-containing protein - cell adhesion - sorocarp development	8.5	U88	93	gi|170595123
ab-tri_asb-55598	-1.35965	1	15.5198	11.3286	Unknown product		similar to orf	4	gi|189242337
ab-tri_asb-56375	-1.36637	0	7180.19	5207.64	Adenine deaminase/adenosine deaminase	110.7	salivary secreted adenosine	78	gi|289742693
ab-tri_asb-10987	-1.38674	1	498.113	355.962	Unknown product		formate dehydrogenase	10	gi|111017435
ab-tri_asb-16431	-1.39303	1	28.0824	20.0553	Glutaredoxin-related protein	44.4	CG12206, isoform A	52	gi|24639508
ab-tri_asb-51807	-1.40013	1.38236e-10	35168.9	24892.5	Adenine deaminase/adenosine deaminase	109	salivary gland growth factor-1 precursor	100	gi|289739673
ab-tri_asb-29538	-1.41026	1	11.0263	7.77285	Unknown product		protein TRC8 homolog	7	gi|328721455
ab-tri_asb-34343	-1.41667	1	13.694	9.59143	Unknown product		FI02835p	7	gi|219990629
ab-tri_asb-3776	-1.44789	1	51.6083	35.3617	U3 small nucleolar ribonucleoprotein (snoRNP) subunit - Mpp10p	48.6	5' nucleotidase	63	gi|126143295
ab-tri_asb-27156	-1.49393	1	37.0419	24.602	Unknown product		CG34383, isoform E	2	gi|161078273
ab-tri_asb-50435	-1.50228	1	33.0376	21.7769	Unknown product		hypothetical protein KOX_09470	16	gi|365908167
ab-tri_asb-46402	-1.54961	1	119.226	76.2924	Unknown product		hypothetical protein R12B2.3	30	gi|193210267
ab-tri_asb-55980	-1.5571	4.77971e-05	856.015	544.859	Threonine aldolase	99.7	threonine aldolase	97	gi|289740589
ab-tri_asb-15851	-1.5625	1	7.50325	4.77491	Unknown product		TPA_inf: HDC10243	17	gi|41618110
ab-tri_asb-23994	-1.5641	1	49.019	31.0987	CG31678 isoform B	90.7	CG31678, isoform B	82	gi|221523470
ab-tri_asb-6692	-1.58537	1	6.48243	4.03588	Unknown product		LOW QUALITY PROTEIN: 7-dehydrocholesterol reductase-like	7	gi|335296693
ab-tri_asb-11093	-1.60109	1	29.3858	18.2495	GJ19392	19.3	CG12206, isoform A	18	gi|24639508
ab-tri_asb-54969	-1.64261	5.72009e-10	7031.59	4242.28	Adenine deaminase/adenosine deaminase	111.7	salivary gland growth factor-2	100	gi|5817646
ab-tri_asb-20026	-1.70833	1	8.23994	4.77802	Ras guanine nucleotide exchange factor - positive regulation of endocytosis - aggregation involved in sorocarp development - cortical actin	7.3	conserved Plasmodium protein, unknown function	72	gi|86170409
ab-tri_asb-31489	-1.78571	1	30.1107	16.7472	chromobox homolog 1 (HP1 beta homolog Drosophila ) - negative regulation of transcription DNA-dependent - identical protein binding - enzyme binding	50.2	similar to chromobox-like 1	76	gi|91084417
ab-tri_asb-16200	-1.8	1	41.5991	22.936	Unknown product		hypothetical protein, conserved	7	gi|322502887
ab-tri_asb-4245	-1.84375	1	29.6422	15.8962	Peptidase M14 carboxypeptidase subfamily A/B-like	94.5	CG3108	25	gi|24639970
ab-tri_asb-55434	-1.88138	0	11353.4	5980.38	salivary secreted protein	100	putative salivary secreted protein	100	gi|289742885
ab-tri_asb-31738	-1.89209	1	26.4099	13.8733	GJ17429	5.8	CG31678, isoform C	6	gi|221510664
ab-tri_asb-19097	-2.03963	0	1607.77	781.196	Unknown product		3-phosphoinositide dependent protein kinase-1	12	gi|156098641
ab-tri_asb-44925	-2.06926	9.05681e-11	1605.54	768.916	Predicted 2-oxoglutarate dehydrogenase E1 subunit	94.4	neural conserved at 73EF, isoform I	99	gi|161084461
ab-tri_asb-19247	-2.12329	1	15.5365	7.3096	Unknown product		MSF transporter protein	10	gi|365908651
ab-tri_asb-56376	-2.12673	0	14627.2	6816	Adenine deaminase/adenosine deaminase	112.5	adenosine deaminase-related growth factor C	100	gi|289742689
ab-tri_asb-56613	-2.25496	4.76674e-12	433.567	190.537	alkaline phosphatase tissue-nonspecific isozyme-like	91	CG16771, isoform A	90	gi|24585213
ab-tri_asb-1487	-2.39095	8.58014e-11	684.994	283.902	Transcription regulator XNP/ATRX DEAD-box superfamily	27	5' nucleotidase	64	gi|126143295
ab-tri_asb-54152	-2.51705	0	139731	55014.8	Tsal2 form A	100	Tsal2 form A	100	gi|125901748
ab-tri_asb-39705	-2.53288	0	99825.2	39057.5	antigen 5 precursor	100	antigen 5 precursor	100	gi|8927462
ab-tri_asb-55716	-2.54298	0	20080.8	7825.56	hypothetical secreted peptide precursor	100	hypothetical secreted peptide precursor	100	gi|289743923
ab-tri_asb-21776	-2.59091	1	5.72986	2.238	Unknown product		C19orf28 protein	18	gi|170587442
ab-tri_asb-55767	-2.66596	0	147295	54753.6	hypothetical secreted protein	100	Glycine/glutamate-rich protein sgp1; Flags: Precursor	100	gi|150416150
ab-tri_asb-20511	-2.77137	0.000473077	140.014	50.0365	salivary C-type lectin	40	salivary C-type lectin	40	gi|289742931
ab-tri_asb-53401	-2.84226	1.66836e-10	490.473	171.005	HIV-1 Vpr-binding protein	7.6	lethal (2) 01289, isoform G	41	gi|281360222
ab-tri_asb-53537	-2.85877	8.67547e-10	2472.49	857.118	salivary secreted adenosine	15.1	5' nucleotidase	62	gi|126143295
ab-tri_asb-56783	-3.06006	0.00632824	102.376	33.1973	Permease of the major facilitator superfamily	102.1	lethal (2) 01810	98	gi|24583789
ab-tri_asb-11349	-3.26277	1	44.8623	13.6147	Unknown product		hypothetical protein STRINF_00564	28	gi|171778585
ab-tri_asb-55788	-3.26682	0	9334.76	2831.73	salivary 5'nucleotidase/apyrase	100	5' nucleotidase	98	gi|126143295
ab-tri_asb-37517	-3.74317	0.0465136	68.7864	18.1998	Unknown product		hypothetical protein HMPREF8573_2303	15	gi|339613526
ab-tri_asb-7180	-3.7472	1.07252e-09	168.208	44.4946	adenosine deaminase-related growth factor	8.9	adenosine deaminase-related growth factor C	10	gi|289742689
ab-tri_asb-3777	-3.81533	0	709.769	184.396	unnamed protein product Klebsiella pneumoniae subsp. pneumoniae MGH 78578	47.2	unnamed protein product	74	gi|152969551
ab-tri_asb-11227	-4.05716	0	9554.92	2333.9	salivary C-type lectin	60	lectin	100	gi|289742917
ab-tri_asb-26754	-4.09069	0	70917.6	17180.5	DNA/RNA non-specific endonuclease	119	Tsal1 protein precursor	100	gi|289743635
ab-tri_asb-23619	-4.66667	1	35.1154	7.51009	Unknown product		leukotriene C4 synthase, isoform CRA_b	64	gi|119574182
ab-tri_asb-55787	-5.01776	0	14873.8	2937.6	5' nucleotidase	96.3	5'-nucleotidase family salivary protein	100	gi|289743375
ab-tri_asb-53459	-6.06773	0	4211.74	687.852	hypothetical conserved secreted protein	100	hypothetical conserved secreted protein	100	gi|289743789
