# Supplementary material for: Insights into the Trypanosome-Host Interactions Revealed through Transcriptomic Analysis of Parasitized Tsetse Fly Salivary Glands
Source: PLoS Negl Trop Dis. 2014 Apr 24;8(4):e2649. doi: 10.1371/journal.pntd.0002649 (PMC3998935; doi:10.1371/journal.pntd.0002649)
Supplement: Table S5 — Trypanosomes genes with significantly higher and over 5-fold difference in expression in the mouse blood compared to parasites recovered from salivary glands. (XLS) [file pntd.0002649.s006.xls]

## Sheet: Blood vs. SG
Feature ID	ID	Kal's Z-test:SG vs Blood normalized values - Bonferroni	Blood - Blood - RPKM	SG - SG - RPKM	Fold
Tb11.02.4450	hypothetical protein, conserved	0	427.986	0.490189	0.00114534
Tb11.42.0005	histone H1, putative	0	488.283	0.768575	0.00157403
Tb927.6.5120	60S acidic ribosomal protein P2, putative	0	279.051	0.570813	0.00204555
Tb927.7.2430	hypothetical protein	0	124.805	0.32865	0.00263331
Tb11.01.0560	hypothetical protein	0	191.635	0.512383	0.00267374
Tb927.7.2090	hypothetical protein, conserved	0	528.301	1.62068	0.00306771
Tb11.24.0006	expression site-associated gene (ESAG, pseudogene), putative,expression site-associated gene 3 (ESAG3), degenerate	8.23697e-12	47.7428	0.179263	0.00375477
Tb927.7.3250	expression site-associated gene (ESAG) protein, putative,expression site-associated gene 6 (ESAG6) protein, putative	0	2188.95	8.33845	0.00380933
Tb927.8.910	hypothetical protein, conserved	0	664.814	2.80114	0.00421342
Tb09.211.3570	glycerol kinase, glycosomal (glk1)	0	254.51	1.26847	0.00498397
Tb09.160.0880	hypothetical protein, unlikely	0	200.741	1.17248	0.00584076
Tb927.1.1510	hypothetical protein, unlikely	0	74.5353	0.478475	0.00641945
Tb927.1.4580	cyclin-like F-box protein (CFB1C)	0	116.048	0.796344	0.00686217
Tb11.02.5600	gp63-1 surface protease homologue, pseudogene,gp63-1 surface protease homologue, fragment	0	208.364	1.43996	0.0069108
Tb927.8.4200	hypothetical protein, conserved	0	193.325	1.34705	0.00696778
Tb927.2.6320	adenosine transporter 2, putative (TbNT6)	0	252.409	1.77719	0.00704093
Tb09.211.3560	glycerol kinase, glycosomal (glk1)	0	123.112	0.887931	0.00721238
Tb927.10.12650	hypothetical protein, conserved	0	134.95	0.985949	0.00730605
Tb927.1.3470	hypothetical protein, unlikely	0	132.354	0.985949	0.00744931
Tb09.211.1710	hypothetical protein, unlikely	0	81.7483	0.650726	0.00796012
Tb927.1.3480	hypothetical protein, unlikely	0	348.553	2.78088	0.00797835
Tb09.v1.0750	hypothetical protein, unlikely	0	68.8824	0.551463	0.00800587
Tb09.142.0400	hypothetical protein, conserved	0	128.838	1.04956	0.00814632
Tb09.211.3540	glycerol kinase, glycosomal (glk1)	0	140.049	1.14163	0.00815162
Tb927.4.1910	hypothetical protein, conserved	0	1237.66	10.1461	0.00819781
Tb09.244.0810	hypothetical protein	0	7069.56	65.0726	0.00920462
Tb927.10.7650	hypothetical protein	4.66748e-07	32.5578	0.32865	0.0100944
Tb927.5.360b	invariant surface glycoprotein, putative	0	130.512	1.36603	0.0104667
Tb11.47.0021	hypothetical protein, conserved	0	1132.84	12.3788	0.0109272
Tb927.10.5150	hypothetical protein, conserved,zinc finger protein family member, putative (ZC3H31)	0	191.298	2.14803	0.0112287
Tb09.160.2690	hypothetical protein, unlikely (1L12.230)	1.41964e-08	37.9756	0.468149	0.0123276
Tb11.01.5820	hypothetical protein, conserved	0	414.886	5.29046	0.0127516
Tb11.03.0550	RNA-binding protein, putative (RBP3)	0	480.627	6.29735	0.0131024
Tb09.160.5430	expression site-associated gene 9 (ESAG9) protein, putative	0	92.8856	1.25623	0.0135245
Tb927.10.3400	hypothetical protein, conserved	2.06336e-09	41.0542	0.573327	0.0139651
Tb11.02.1106	nucleobase/nucleoside transporter 8.1	0	646.994	9.45803	0.0146184
Tb927.3.4010	hypothetical protein	0.000530658	22.5267	0.330318	0.0146634
Tb09.142.0410	hypothetical protein	0	73.863	1.11235	0.0150597
Tb927.2.6220	adenosine transporter 2, putative (TbNT4)	0	93.0231	1.40546	0.0151087
Tb927.6.690	hypothetical protein, conserved	0	379.948	5.81842	0.0153137
Tb927.2.6200	adenosine transporter 2, putative (TbNT3)	0	227.137	3.63847	0.0160188
Tb927.6.820	pumilio RNA binding protein, putative (PUF4)	0	124.314	2.05613	0.0165398
Tb927.10.9610	hypothetical protein	4.11848e-11	47.2762	0.784008	0.0165836
Tb09.v1.0290	variant surface glycoprotein (VSG)-related, putative	0	455.074	7.6036	0.0167085
Tb11.51.0002	expression site-associated gene (ESAG, pseudogene), putative,expression site-associated gene 9 (ESAG9), fragment	0	175.529	2.95785	0.0168511
Tb09.160.5440	variant surface glycoprotein (VSG)-related, putative	0	188.25	3.1829	0.0169079
Tb09.211.0990	hypothetical protein, conserved	0	141.505	2.5353	0.0179167
Tb11.02.5640	MSP-A, putative	0	113.308	2.13297	0.0188246
Tb09.142.0310	expression site-associated gene (ESAG) protein,expression site-associated gene 1 (ESAG1) protein	0.00186616	20.9356	0.396784	0.0189527
Tb09.160.2680	hypothetical protein, unlikely (1L12.225)	0	70.7924	1.3417	0.0189527
Tb927.1.1450	hypothetical protein, unlikely	1.15318e-10	46.0821	0.87936	0.0190825
Tb927.10.12660	pumilio/PUF RNA binding protein 2 (PUF2)	0	178.205	3.52988	0.019808
Tb11.02.5700	endonuclease/exonuclease/phosphatase, putative	0	172.021	3.44363	0.0200186
Tb927.10.12770	hypothetical protein	0.000279171	23.8757	0.48202	0.0201887
Tb11.02.0050	hypothetical protein	0	56.6056	1.14834	0.0202867
Tb927.6.2030	protein kinase, putative	0	166.975	3.41516	0.0204531
Tb927.7.3970	hypothetical protein, conserved	0	390.657	8.26157	0.0211479
Tb927.10.10360	microtubule-associated protein, putative	0.00516544	19.5819	0.427173	0.0218146
Tb927.4.3970	hypothetical protein, conserved	0	173.961	3.95798	0.0227522
Tb927.7.7370	hypothetical protein	4.40281e-05	26.8822	0.613893	0.0228364
Tb927.8.6650	RNA-binding protein, putative (DRBD12)	0	126.484	2.92655	0.0231376
Tb927.2.3280	65 kDa invariant surface glycoprotein (10C8.440)	0	329.384	7.81516	0.0237266
Tb927.10.12280	hypothetical protein	4.70331e-09	41.0511	0.985949	0.0240176
Tb927.8.7820	hypothetical protein, conserved	0	352.246	8.50454	0.0241437
Tb927.10.9460	hypothetical protein, unlikely	5.1481e-09	40.964	1.00112	0.024439
Tb927.3.5740	hypothetical protein	0	102.044	2.52709	0.0247648
Tb09.v1.0760	hypothetical protein, unlikely	9.74021e-10	43.5991	1.08454	0.0248754
Tb09.142.0370	hypothetical protein, conserved	0	379.057	9.4599	0.0249564
Tb11.02.5630	MSP-A, putative	0	143.465	3.58942	0.0250195
Tb11.17.0009	expression site-associated gene (ESAG, pseudogene), putative,expression site-associated gene 9 (ESAG9), degenerate	0	277.373	6.94108	0.0250243
Tb09.160.1430	hypothetical protein, unlikely (3C4.385)	0	76.6935	1.94247	0.0253276
Tb927.3.560	expression site-associated gene (ESAG) protein, putative,expression site-associated gene 11 (ESAG11) protein, putative	0	108.227	2.81142	0.0259771
Tb927.10.9600	protein kinase, putative,tyrosine protein kinase, putative	0	152.187	3.98404	0.0261786
Tb927.3.1630	casein kinase 1, putative (CK1)	0	209.802	5.51738	0.026298
Tb11.01.3940	RNA-binding protein, putative (RBP9)	0	332.958	8.85236	0.026587
Tb09.211.1120	hypothetical protein, unlikely	3.45774e-06	31.1422	0.834265	0.0267889
Tb09.142.0380	hypothetical protein, conserved	0	123.117	3.30878	0.026875
Tb927.1.1500	hypothetical protein, conserved	0	120.12	3.22917	0.0268829
Tb927.10.12780	hypothetical protein, conserved,zinc finger protein family member, putative (ZC3H37)	0	208.664	5.66835	0.027165
Tb927.3.2510	expression site-associated gene (ESAG) protein, putative,expression site-associated gene 2 (ESAG2) protein, putative	0	75.8024	2.06679	0.0272655
Tb927.10.12570	hypothetical protein	0.00240715	21.083	0.575864	0.0273141
Tb09.v1.0600	hypothetical protein, unlikely	5.54762e-07	34.034	0.929609	0.0273141
Tb927.10.6660	hypothetical protein	0	151.606	4.14099	0.0273141
Tb09.160.2650	hypothetical protein, conserved (1L12.210)	0	142.362	3.97903	0.0279501
Tb09.160.0640	hypothetical protein, unlikely	0.00042163	23.8433	0.67784	0.028429
Tb927.10.7660	hypothetical protein	0.0436622	16.7077	0.474983	0.028429
Tb927.1.3740	hypothetical protein, unlikely	0	1331.93	39.4885	0.0296476
Tb927.5.400	75 kDa invariant surface glycoprotein, putative (ISG75)	9.64403e-05	26.3446	0.820736	0.0311538
Tb927.10.5250	hypothetical protein, conserved,zinc finger protein family member, putative (ZC3H32)	0	195.541	6.15016	0.031452
Tb927.5.150	hypothetical protein, conserved	0	303.446	9.77226	0.0322042
Tb927.1.4890	expression site-associated gene 2 (ESAG2) protein, putative	0	357.999	11.8704	0.0331576
Tb11.0370	MSP-A, putative,chrXI additional, unordered contigs	0	96.6839	3.20937	0.0331944
Tb11.0380	MSP-A, putative,chrXI additional, unordered contigs	0	319.056	10.5959	0.0332101
Tb11.57.0008	calpain-like protein, putative,cytoskeleton assocociated protein, putative	0	74.8779	2.5408	0.0339326
Tb927.3.5770	hypothetical protein	2.47109e-11	50.735	1.72378	0.0339761
Tb927.3.570	expression site-associated gene (ESAG) protein, putative,expression site-associated gene 2 (ESAG2) protein, putative	0	61.4952	2.1204	0.0344807
Tb09.v1.0860	hypothetical protein, unlikely	0	56.7747	2.00224	0.0352663
Tb927.10.13460	hypothetical protein	0	83.1639	2.95785	0.0355665
Tb927.5.810	hypothetical protein, conserved,zinc finger protein family member, putative (ZC3H11)	0	6167.85	219.551	0.0355961
Tb927.10.14270	TFIIF-stimulated CTD phosphatase, putative	0	148.201	5.27875	0.0356188
Tb927.1.460	hypothetical protein, unlikely	0	3176.51	113.17	0.0356271
Tb927.7.2660	hypothetical protein, conserved,zinc finger protein family member, putative (ZC3H20)	0	975.225	34.8747	0.0357606
Tb11.01.8530	hypothetical protein	2.30223e-09	43.7733	1.59269	0.0363849
Tb11.57.0077	hypothetical protein, conserved	0	98.9878	3.61515	0.0365211
Tb927.8.2070	hypothetical protein, conserved	0	978.831	35.9297	0.0367067
Tb927.7.5340	hypothetical protein, conserved	0	319.931	12.0037	0.0375196
Tb927.3.1470	variant surface glycoprotein (VSG)-related, putative	0	127.249	4.80044	0.0377247
Tb11.17.0011	retrotransposon hot spot protein (RHS, pseudogene), putative,retrotransposon hot spot protein (RHS), degenerate	0	179.787	6.90358	0.0383987
Tb927.8.7110	serine/threonine-protein kinase a, putative,protein kinase, putative	0	128.128	4.97139	0.0388002
Tb927.1.5200	expression site-associated gene (ESAG) protein, putative,expression site-associated gene 1 (ESAG1) protein, putative	0	101.933	4.01683	0.0394065
Tb927.4.710	hypothetical protein, conserved	0	88.3307	3.54942	0.0401833
Tb927.1.3730	hypothetical protein	0	139.335	5.60971	0.0402607
Tb927.7.170	expression site-associated gene (ESAG) protein, putative,expression site-associated gene 9 (ESAG9) protein, putative	0	386.746	15.6364	0.0404307
Tb09.211.4940	hypothetical protein, unlikely,Ingi-like sequence	0	1173.71	47.596	0.0405519
Tb927.1.4940	hypothetical protein, unlikely	0.000655566	24.0644	0.985949	0.0409712
Tb10.v4.0128	hypothetical protein,chrX additional, unordered contig	0	1455.97	59.7542	0.0410407
Tb11.02.5690	hypothetical protein	7.12498e-10	46.3224	1.90589	0.0411441
Tb09.v1.0320	expression site-associated gene 2 (ESAG2) protein, putative	0	105.87	4.40238	0.0415827
Tb927.10.15040	hypothetical protein, conserved	0	80.1183	3.35939	0.0419304
Tb927.4.5090	hypothetical protein	2.02454e-06	33.5117	1.41462	0.0422127
Tb927.1.1460	hypothetical protein, unlikely	0	101.427	4.31421	0.042535
Tb11.01.5650	protein kinase, putative	0	85.8836	3.65798	0.0425924
Tb927.1.4270	hypothetical protein, unlikely	0	103.324	4.4117	0.0426979
Tb05.5K5.260	variant surface glycoprotein (VSG), putative,BAC from homologous region on chr5	0	156.979	6.99909	0.0445863
Tb927.3.1520	variant surface glycoprotein (VSG)-related, putative	0	127.122	5.68941	0.0447557
Tb927.10.14550	ATP-dependent DEAD/H RNA helicase, putative	0	307.912	13.7824	0.0447608
Tb927.1.3510	hypothetical protein, unlikely	0.00236204	22.2787	1.00112	0.0449361
Tb11.02.5610	MSP-A, putative	0	248.083	11.1612	0.0449899
Tb927.10.12760	hypothetical protein, conserved,zinc finger protein family member, putative (ZC3H36)	0	136.751	6.15829	0.045033
Tb09.160.5400	expression site-associated gene 9 (ESAG9) protein, putative	0	179.393	8.16501	0.0455145
Tb09.160.3390	hypothetical protein, unlikely (28G16.15)	0.0290749	18.2661	0.834265	0.0456728
Tb11.1190	hypothetical protein,chrXI additional, unordered contigs	2.51183e-05	29.7534	1.36339	0.045823
Tb927.7.6300	hypothetical protein, conserved	0	60.7372	2.80652	0.0462075
Tb927.8.870	serine/threonine kinase, putative,protein kinase, putative	0	256.808	11.8996	0.0463366
Tb927.10.3420	NADH-ubiquinone oxidoreductase c, putative	0.0359318	17.9667	0.834265	0.046434
Tb927.1.1740	hypothetical protein	0	174.909	8.24738	0.0471523
Tb927.10.490	hypothetical protein	1.00545e-07	39.039	1.85922	0.0476246
Tb09.v4.0151	hypothetical protein,chrIX additional, unordered contigs	0	247.038	11.9422	0.0483414
Tb927.8.2280	hypothetical protein, conserved	0	157.98	7.78476	0.0492769
Tb09.160.4880	hypothetical protein, unlikely	1.35111e-05	31.1422	1.54935	0.0497507
Tb11.0360	MSP-A, putative,chrXI additional, unordered contigs	0	142.509	7.21884	0.0506553
Tb927.10.5160	hypothetical protein	0.000572893	25.0359	1.27593	0.0509642
Tb927.10.14160	aquaglyceroporin (small solute channel), putative	0	205.079	10.4543	0.0509769
Tb927.8.2260	hypothetical protein, conserved	0	164.428	8.38359	0.0509864
Tb927.8.6340	CYC2-like cyclin, putative (CYC10)	0	282.498	14.6751	0.0519478
Tb927.5.350b	invariant surface glycoprotein, putative	4.63741e-09	44.8377	2.36402	0.0527239
Tb09.v4.0110	hypothetical protein,chrIX additional, unordered contigs	0	123.413	6.53568	0.0529578
Tb927.10.15310	hypothetical protein, conserved	0	93.7367	5.03881	0.0537549
Tb927.8.8320	hypothetical protein, conserved	0	366.535	19.7967	0.0540105
Tb10.v4.0218	expression site-associated gene (ESAG) protein, putative,expression site-associated gene 3 (ESAG3) protein, putative,chrX additional, unordered contigs	0.000492544	25.5845	1.40156	0.0547817
Tb927.7.2420	glycogen synthase kinase-3 alpha, putative	0	115.481	6.35171	0.0550024
Tb927.3.3060	hypothetical protein, conserved	0	522.976	28.816	0.0551
Tb11.02.0357	hypothetical protein, conserved	0	67.8545	3.79281	0.0558962
Tb927.5.110	variant surface glycoprotein (VSG)-related, putative	0	104.458	5.8812	0.056302
Tb927.7.5380	RNA-binding protein, putative	0	109.443	6.17526	0.0564246
Tb11.02.4860	protein kinase, putative	0	132.704	7.53328	0.0567675
Tb927.5.4620	expression site-associated gene (ESAG) protein, putative,expression site-associated gene 9 (ESAG9) protein, putative	0	119.379	6.79209	0.0568954
Tb927.8.2270	hypothetical protein, conserved	2.08966e-05	31.1661	1.79648	0.0576422
Tb11.01.8550	mitogen-activated protein kinase (ECK1)	0	81.5709	4.74694	0.0581941
Tb09.160.5610	hypothetical protein, unlikely	1.64739e-11	55.4721	3.25363	0.0586535
Tb927.3.5250	hypothetical protein, conserved,ZFP family member, putative (ZC3H8)	0	97.5103	5.72139	0.0586748
Tb927.1.1940	hypothetical protein, unlikely	0	123.486	7.35604	0.05957
Tb11.17.0003	variant surface glycoprotein (VSG, pseudogene)-related, putative,variant surface glycoprotein (VSG), interrupted	0	179.422	10.775	0.0600541
Tb09.v4.0013	retrotransposon hot spot (RHS) protein, putative,chrIX additional, unordered contigs	3.43646e-08	42.416	2.54969	0.0601116
Tb927.6.2520	hypothetical protein, conserved	0	111.651	6.71365	0.0601304
Tb927.10.11630	hypothetical protein, conserved	0	115.57	6.96841	0.0602962
Tb927.10.3980	hypothetical protein	0	745.177	44.997	0.0603844
Tb09.244.2180	retrotransposon hot spot protein 3 (RHS3), putative	0	101.805	6.16594	0.0605661
Tb09.160.1510	hypothetical protein, unlikely (3C4.360)	0	145.802	8.87354	0.0608601
Tb11.57.0010	expression site-associated gene (ESAG, pseudogene), putative,expression site-associated gene 3 (ESAG3), frameshifted and degenerate	5.85525e-08	41.5987	2.53324	0.0608971
Tb09.v1.0310	expression site-associated gene 11 (ESAG11) protein, putative	0	98.9591	6.08426	0.0614826
Tb09.v4.0011	variant surface glycoprotein (VSG), putative,chrIX additional, unordered contigs	1.20713e-08	44.4467	2.74568	0.0617747
Tb09.211.1720	hypothetical protein, conserved,predicted zinc finger protein	0	98.9878	6.19739	0.0626077
Tb927.7.3730	RNA-binding protein, putative (RBP26)	0	250.419	15.7611	0.0629389
Tb927.7.6340	hypothetical protein, conserved	0	224.727	14.1499	0.0629645
Tb927.1.2600	pumilio/PUF RNA binding protein 9 (PUF9)	0	146.397	9.22895	0.0630405
Tb927.6.1800	protein phosphatase 2C, putative	0	228.709	14.5242	0.0635053
Tb927.6.2850	ESAG8-associated protein, putative (PIE8)	0	143.247	9.10716	0.0635766
Tb927.10.4400	hypothetical protein, conserved	0	142.419	9.12604	0.0640789
Tb927.6.3490	zinc finger protein (ZFP1)	0	2172.17	139.793	0.0643565
Tb927.4.1880	hypothetical protein, conserved	0	353.267	23.1883	0.0656397
Tb927.10.4740	nucleolar RNA-binding protein, putative	0	278.09	18.3017	0.065812
Tb927.1.4660	hypothetical protein, unlikely	0	243.036	16.2682	0.0669374
Tb927.1.4870	expression site-associated gene (ESAG) protein, putative,expression site-associated gene 1 (ESAG1) protein, putative	0	137.875	9.26792	0.0672197
Tb09.244.2020	nucleoside transporter 1, putative	0.000733846	25.9196	1.75144	0.0675719
Tb927.3.2520	expression site-associated gene (ESAG) protein, putative,expression site-associated gene 1 (ESAG1) protein, putative	0.00014599	28.8904	2.00224	0.0693045
Tb927.10.2440	metacaspase MCA4,cysteine peptidase, Clan CD, family C13, putative (MCA4)	0	336.099	23.3453	0.0694596
Tb927.1.4850	hypothetical protein, unlikely	6.80075e-07	38.3945	2.67422	0.069651
Tb927.5.2620	hypothetical protein, conserved	0	299.517	21.2094	0.0708122
Tb11.01.8270	hypothetical protein, conserved,zinc finger protein family member, putative (ZC3H46)	0	199.323	14.3513	0.072
Tb927.7.3720	hypothetical protein	8.4223e-10	50.8494	3.72812	0.0733169
Tb927.8.3570	hypothetical protein, conserved	0	219.507	16.3081	0.0742944
Tb927.1.230	hypothetical protein, unlikely	0	4225.43	316.49	0.0749011
Tb927.3.4590	hypothetical protein, conserved	0	156.523	11.7859	0.0752984
Tb927.5.3620	kinetoplastid-specific dual specificity phosphatase, putative	0	197.206	14.8958	0.0755344
Tb11.01.4230	protein kinase, putative	0	214.523	16.2052	0.0755406
Tb927.4.1000	hypothetical protein, conserved	0	1073.39	81.7834	0.0761916
Tb927.7.6220	protein kinase, putative	0	88.6356	6.7933	0.076643
Tb10.v4.0215	hypothetical protein,chrX additional, unordered contig	0	275.928	21.4214	0.0776342
Tb09.160.5460	hypothetical protein, unlikely	0	65.9724	5.13731	0.0778707
Tb927.1.1530	protein kinase, putative	0	75.1568	5.85292	0.0778761
Tb927.5.120	expression site-associated gene (ESAG) protein, putative,expression site-associated gene 9 (ESAG9) protein, putative	0	79.9886	6.23984	0.0780092
Tb927.6.1310	hypothetical protein, conserved	0.00019364	29.1861	2.28134	0.0781655
Tb927.4.3770	protein kinase, putative	0	246.43	19.4511	0.0789315
Tb927.8.5110	hypothetical protein, conserved	0	148.808	11.9702	0.0804406
Tb09.211.2360	protein kinase A catalytic subunit isoform 2,protein kinase A catalytic subunit (PKAC2)	0	155.665	12.5511	0.080629
Tb927.7.2670	hypothetical protein, conserved,zinc finger protein family member, putative (ZC3H21)	0	165.162	13.3342	0.0807343
Tb927.7.6700	hypothetical protein	0	299.669	24.3354	0.0812075
Tb927.10.8520	glucose transporter, putative	2.47059e-05	33.2282	2.70113	0.0812903
Tb09.211.1160	hypothetical protein, unlikely	0	144.643	11.7601	0.0813047
Tb11.02.0730	metacaspase,cysteine peptidase, Clan CD, family C13 (mca1)	0	295.355	24.0242	0.0813401
Tb927.1.200	hypothetical protein, unlikely	0	1171.17	95.2849	0.0813588
Tb09.211.2340	hypothetical protein, unlikely	0.0014804	25.8253	2.11618	0.0819424
Tb927.1.2250	hypothetical protein, unlikely	0	89.1367	7.30407	0.0819424
Tb927.5.1490	hypothetical protein, conserved	0	99.9369	8.27329	0.0827852
Tb927.2.2340	hypothetical protein, conserved (25N14.95)	0	70.5727	5.87162	0.0831996
Tb927.1.4070	hypothetical protein, unlikely	5.49602e-05	31.9954	2.67422	0.0835812
Tb11.02.4710	hypothetical protein	0	68.7578	5.84923	0.08507
Tb11.1200	hypothetical protein,chrXI additional, unordered contigs	0	128.539	11.0609	0.086051
Tb927.8.5350	hypothetical protein, conserved	9.47251e-11	57.0941	4.94704	0.0866472
Tb927.2.6000	glycosylphosphatidylinositol-specific phospholipase C (GPI-PLC)	0	214.459	18.7549	0.0874525
Tb927.10.12060	hypothetical protein, conserved	0	72.6339	6.35917	0.087551
Tb11.02.1200	hypothetical protein, conserved	0	230.082	20.2499	0.0880115
Tb927.10.12800	hypothetical protein, conserved,zinc finger protein family member, putative (ZC3H38)	0	569.537	50.4834	0.0886394
Tb927.1.5110	expression site-associated gene 11 (ESAG11) protein, putative	0	199.782	17.7149	0.0886709
Tb927.6.2530	hypothetical protein	0.00113417	26.9086	2.39899	0.0891533
Tb927.10.4430	pumillo RNA binding protein PUF1 (PUF1)	0	97.992	8.74449	0.0892368
Tb927.7.6580	hypothetical protein	0	301.75	27.31	0.0905053
Tb927.1.4900	expression site-associated gene 11 (ESAG11) protein, putative	0	421.416	38.142	0.0905093
Tb927.1.1900	hypothetical protein, unlikely	0	92.0392	8.37569	0.0910013
Tb11.02.0380	hypothetical protein, conserved	0	144.722	13.2053	0.0912459
Tb927.6.860	hypothetical protein	0	129.704	11.8948	0.0917075
Tb927.10.530	hypothetical protein, conserved	0	150.039	13.789	0.0919028
Tb927.1.2260	calpain-like protein fragment, putative	0	665.391	61.1649	0.0919233
Tb927.6.3140	hypothetical protein, conserved	0	293.537	27.1345	0.0924401
Tb927.3.3940	RNA-binding protein, putative (DRBD11)	0	235.839	22.4083	0.0950153
Tb927.2.2770	hypothetical protein, conserved (10C8.185)	0	504.405	47.9442	0.095051
Tb927.1.5060	variant surface glycoprotein (VSG)-related, putative	0	177.943	16.9264	0.0951228
Tb927.1.490	hypothetical protein	0	541.275	51.491	0.0951291
Tb927.7.5770	Nuclear Dbf2-related kinase (PK53)	0	155.061	15.0168	0.0968442
Tb927.2.4280	kinetoplastid-specific dual specificity phosphatase, putative (28H13.490)	0	147.714	14.3625	0.0972314
Tb927.8.1200	vacuolar-type Ca2 -ATPase 2 (TbA2)	0	129.86	12.8732	0.0991318
Tb09.160.3070	hypothetical protein, unlikely (1L12.430)	0.0214105	22.169	2.20585	0.0995015
Tb10.v4.0033	pumillo RNA binding protein PUF1,chrX additional, unordered contigs (PUF1)	0	96.7692	9.65301	0.0997529
Tb927.5.610	acidic phosphatase, putative	0	483.672	48.6584	0.100602
Tb09.244.2170	hypothetical protein, conserved	0	544.685	55.014	0.101001
Tb927.3.5670	hypothetical protein	1.46206e-09	54.4294	5.51955	0.101408
Tb09.160.2700	hypothetical protein, unlikely (1L12.235)	0.00015107	31.9208	3.25363	0.101928
Tb09.211.3240	hypothetical protein, conserved,leucine-rich repeat protein (LRRP), putative	0	342.031	34.9877	0.102294
Tb927.4.4230	RNA-binding protein, putative (RBP31)	3.92471e-06	39.221	4.05648	0.103426
Tb927.10.8730	hypothetical protein, conserved	0	111.247	11.6044	0.104311
Tb927.10.4420	hypothetical protein	0	75.243	7.86113	0.104477
Tb05.5K5.240	expression site-associated gene (ESAG) protein, putative,expression site-associated gene 3 (ESAG3) protein, putative,BAC from homologous region on chr5	8.23697e-12	65.4695	6.90164	0.105418
Tb927.1.2490	histone H3, putative	0	5208.49	549.344	0.105471
Tb09.v4.0107	expression site-associated gene (ESAG) protein, putative,expression site-associated gene 5 (ESAG5) protein, putative,chrIX additional, unordered contigs	0.000763325	29.1238	3.07957	0.105741
Tb927.6.3480	RNA-binding protein, putative (DRBD5)	0	109.535	11.5934	0.105842
Tb927.3.650	hypothetical protein, conserved	0	93.9828	10.0708	0.107155
Tb09.244.2160	hypothetical protein	0	231.885	24.892	0.107347
Tb927.1.5120	expression site-associated gene (ESAG) protein, putative,expression site-associated gene 1 (ESAG1) protein, putative	0	202.614	21.7568	0.107381
Tb09.211.2060	hypothetical protein	0	464.395	50.1508	0.107992
Tb09.211.2290	chaperone protein DNAj, putative	0	85.1927	9.21223	0.108134
Tb927.2.3330	hypothetical protein (10C8.465)	0.0334932	21.9325	2.38071	0.108547
Tb927.6.4140	paraflagellar rod component, putative (PFC4)	0	1901.83	207.089	0.108889
Tb927.7.2680	hypothetical protein, conserved,zinc finger protein family member, putative (ZC3H22)	0	149.172	16.3807	0.109811
Tb927.6.600	CCR4 associated factor, putative (CAF1)	0	281.227	30.9242	0.109962
Tb927.3.1910	hypothetical protein, conserved	0	85.0395	9.39117	0.110433
Tb09.160.1920	hypothetical protein, unlikely (3C4.185)	0.0384612	21.7996	2.4101	0.110557
Tb927.10.5090	hypothetical protein, conserved	0	273.499	30.4372	0.111288
Tb927.7.3260	expression site-associated gene (ESAG) protein, putative,expression site-associated gene 7 (ESAG7) protein, putative	0	393.44	43.7872	0.111293
Tb927.6.1790	hypothetical protein	8.23697e-12	66.3542	7.39462	0.111442
Tb09.211.3520	hypothetical protein, unlikely	0	155.93	17.4138	0.111677
Tb927.10.8530	glucose transporter,glucose transporter 2A (THT2A)	0.00151292	28.3806	3.19224	0.11248
Tb11.02.1565	hypothetical protein	0	82.2155	9.25478	0.112567
Tb09.160.5380	expression site-associated gene 11 (ESAG11) protein, putative	0	132.528	14.9499	0.112806
Tb927.10.8510	glucose transporter, putative	0.00101118	29.2619	3.31502	0.113288
Tb927.10.40	hypothetical protein	0.0236894	23.041	2.63808	0.114495
Tb11.02.0815	ubiquitin-conjugating enzyme, putative,ubiquitin-conjugating enzyme-like protein, putative	0	997.431	114.288	0.114582
Tb927.2.1820	protein kinase, putative (27H14.30)	1.08048e-07	48.0652	5.54478	0.11536
Tb927.1.5050	hypothetical protein, unlikely	0.000293425	32.032	3.71844	0.116085
Tb11.17.0004	hypothetical protein, conserved	0	161.045	18.6949	0.116085
Tb927.7.180	hypothetical protein	0	498.749	58.4641	0.117221
Tb11.02.0010	hypothetical protein, conserved	0	223.896	26.2574	0.117275
Tb927.1.1950	hypothetical protein, unlikely	7.73513e-08	49.0786	5.76593	0.117484
Tb09.211.2820	hypothetical protein, unlikely	0.00172268	28.5918	3.36583	0.11772
Tb11.01.5660	cyclin 2,G1 cyclin (CYC2)	0	230.977	27.2584	0.118013
Tb09.160.5390	expression site-associated gene 2 (ESAG2) protein, putative	9.06237e-07	44.1456	5.22782	0.118422
Tb927.10.12040	protein kinase, putative,mitogen-activated protein kinase 11, putative	0	236.839	28.2925	0.119459
Tb09.211.1130	hypothetical protein, conserved,zinc finger protein family member, putative (ZC3H29)	0	330.158	39.6784	0.12018
Tb927.3.4670	cdc2-related kinase, putative,cell division control protein, putative (CRK10)	0	128.815	15.5022	0.120345
Tb927.4.2750	hypothetical protein, conserved	0	195.987	23.6138	0.120486
Tb11.01.8580	hypothetical protein, conserved	0	140.63	16.9784	0.120732
Tb927.5.480	hypothetical protein, conserved	0	93.3653	11.2872	0.120893
Tb927.1.4650	cyclin-like F-box protein (CFB2)	0	848.461	102.792	0.121151
Tb927.8.730	nucleolar RNA-binding protein, putative	0	564.599	68.7422	0.121754
Tb11.02.2210	protein kinase A regulatory subunit (PKA-R)	0	415.843	50.7174	0.121963
Tb11.01.8460	cyclin 6,mitotic cyclin (pers. comm. J. Mottram, Univ. of Glasgow) (CYC6)	0	156.995	19.2903	0.122872
Tb09.211.0940	hypothetical protein, conserved	0	199.43	24.6525	0.123615
Tb11.01.0090	hypothetical protein, conserved,zinc finger protein family member, putative (ZC3H45)	0	90.5071	11.2626	0.124439
Tb09.211.0560	RNA-binding protein (DRBD3)	0	861.252	107.437	0.124745
Tb927.8.3410	hypothetical protein, conserved	2.05924e-12	72.7183	9.1311	0.125568
Tb927.6.640	kinetoplastid-specific phospho-protein phosphatase, putative	0	93.5615	11.7652	0.125748
Tb927.7.960	protein kinase, putative	0	127.808	16.138	0.126268
Tb927.2.4200	protein kinase, putative (28H13.450)	0	114.308	14.4815	0.126688
Tb09.160.1070	hypothetical protein, conserved	0	103.255	13.1835	0.12768
Tb927.7.6590	hypothetical protein, conserved	0	301.531	38.6243	0.128094
Tb927.8.6760	IgE-dependent histamine-releasing factor, putative	0	765.089	98.1366	0.128268
Tb927.7.520	hypothetical protein, conserved	0	174.091	22.3331	0.128285
Tb927.6.4110	hypothetical protein	0.00140304	30.048	3.86918	0.128767
Tb927.2.3080	fatty acid desaturase, putative,oleate desaturase, putative (10C8.340)	0	273.865	35.3145	0.128949
Tb927.2.3880	heterogeneous nuclear ribonucleoprotein H/F, putative (HNRNPH)	0	110.753	14.4013	0.130031
Tb927.3.2590	hypothetical protein	5.90385e-09	56.7888	7.44295	0.131064
Tb927.5.3290	hypothetical protein, conserved	0	77.8354	10.2613	0.131834
Tb11.03.0580	RNA-binding protein, UBP2 (UBP2)	0	131.869	17.4138	0.132054
Tb927.1.4920	hypothetical protein	0.000483345	32.6517	4.31604	0.132184
Tb927.1.3550	hypothetical protein	0	133.723	17.8771	0.133687
Tb927.4.4520	hypothetical protein, conserved	0	173.263	23.3294	0.134648
Tb927.7.5950	hypothetical protein, conserved	0	132.706	17.9428	0.135207
Tb927.2.5760	hypothetical protein, conserved (1F7.250)	0	103.024	13.9649	0.13555
Tb927.1.3540	hypothetical protein, unlikely	5.76588e-11	67.7964	9.21383	0.135904
Tb927.8.3670	hypothetical protein	7.82178e-07	46.9999	6.3875	0.135904
Tb927.5.1970	hypothetical protein	0	260.645	35.5754	0.13649
Tb927.8.8260	amino acid transporter, putative	0	99.1089	13.53	0.136516
Tb11.57.0017	expression site-associated gene (ESAG, pseudogene), putative,expression site-associated gene 3 (ESAG3), frameshifted and degenerate	1.54361e-08	55.692	7.60589	0.136571
Tb11.51.0004	expression site-associated gene (ESAG, pseudogene), putative,expression site-associated gene 9 (ESAG9), fragment	6.2568e-08	52.7969	7.26392	0.137582
Tb927.10.4390	hypothetical protein	0.000431724	33.4779	4.60931	0.137682
Tb927.5.800	casein kinase I, isoform 2 (CK1.2)	0	743.241	102.358	0.137719
Tb09.211.4270	ubiquitin carboxyl-terminal hydrolase, putative,cysteine peptidase, Clan CA, family C19, putative	0	85.4165	11.784	0.137959
Tb927.10.3680	hypothetical protein, conserved	0	172.468	24.0926	0.139694
Tb927.1.4300	chaperone protein DNAj, putative	0	161.974	22.7575	0.140501
Tb927.10.8050	TFIIF-stimulated CTD phosphatase, putative	0	209.423	29.4899	0.140815
Tb927.7.2140	hypothetical protein,zinc finger protein family member, putative (ZC3H18)	0	257.009	36.2219	0.140937
Tb927.7.5790	protein disulfide isomerase, putative	0	915.329	129.266	0.141223
Tb927.10.610	hypothetical protein, conserved	0	111.681	15.8177	0.141633
Tb927.5.1390	64 kDa invariant surface glycoprotein (ISG64)	0	102.447	14.5105	0.141638
Tb927.2.2320	hypothetical protein (25N14.105)	0.000226088	35.3345	5.00559	0.141663
Tb11.03.0990	expression site-associated gene 4 (ESAG4) protein, putative,receptor-type adenylate cyclase	9.2843e-08	52.6759	7.48088	0.142017
Tb11.47.0026	hypothetical protein, conserved	0	251.461	35.7972	0.142357
Tb927.2.3720	ubiquitin-conjugating enzyme, putative (28H13.210)	0	97.6902	13.9441	0.142738
Tb927.1.1480	hypothetical protein, unlikely	6.60316e-08	53.583	7.65561	0.142874
Tb927.2.5860	hypothetical protein, conserved (1F7.300)	0	90.42	12.92	0.142888
Tb927.4.2690	hypothetical protein	3.35039e-09	60.3309	8.64434	0.143282
Tb927.10.10450	hypothetical protein	0	1450.41	209.441	0.144401
Tb927.8.3540	hypothetical protein, conserved	0	96.7048	14.0353	0.145135
Tb927.3.3340	3', 5'-cyclic nucleotide phosphodiesterase, putative (PDED)	8.23697e-12	74.383	10.7971	0.145155
Tb11.01.2700	hypothetical protein, conserved	0	135.558	19.6814	0.145188
Tb09.160.5630	hypothetical protein, unlikely	2.67701e-11	71.6271	10.4116	0.145359
Tb09.142.0440	hypothetical protein, conserved	0	582.709	85.2676	0.14633
Tb11.01.4850	hypothetical protein, conserved	0	570.71	83.6066	0.146496
Tb09.160.1200	microtubule- associated protein (GB4)	5.68499e-07	49.3832	7.24481	0.146706
Tb11.02.1660	hypothetical protein, conserved	0	155.288	22.8331	0.147037
Tb927.6.1640	single strand-specific nuclease, putative	1.07081e-10	68.9879	10.1755	0.147496
Tb09.211.4511	kinetoplastid membrane protein KMP-11	0	371.713	55.3514	0.148909
Tb927.6.3880	hypothetical protein, conserved	0	182.83	27.2837	0.14923
Tb927.5.370b	invariant surface glycoprotein, putative	0.000279203	35.7482	5.33993	0.149376
Tb11.03.0350	hypothetical protein, conserved	0	136.844	20.4687	0.149577
Tb927.4.4510	protein phosphatase 2C, putative	3.29479e-11	72.5656	10.9515	0.150919
Tb11.01.6380	hypothetical protein, conserved	0	312.242	47.1328	0.15095
Tb927.10.15620	hypothetical protein	0.00209585	31.3855	4.74488	0.151181
Tb927.1.2650	hypothetical protein, unlikely	0.0277077	25.5811	3.87337	0.151415
Tb927.1.3320	leucine-rich repeat protein (LRRP), putative	0.000127644	37.7817	5.72551	0.151542
Tb927.4.2760	hypothetical protein, conserved	0	102.234	15.5186	0.151795
Tb927.1.4830	phospholipase A1 (PLA1)	0	227.728	34.6769	0.152274
Tb927.4.4990	ubiquinol-cytochrome c reductase, putative	0	155.102	23.6207	0.152292
Tb09.160.5510	hypothetical protein	1.12229e-09	64.8631	9.94741	0.15336
Tb09.160.5530	hypothetical protein, conserved	0	257.184	39.4794	0.153506
Tb09.160.5480	purine nucleoside transporter (TbNT10)	0	389.082	60.0251	0.154274
Tb927.8.3030	hypothetical protein	1.73528e-07	53.4432	8.27195	0.15478
Tb927.5.1430	64 kDa invariant surface glycoprotein (ISG64)	0	188.357	29.7689	0.158045
Tb927.10.480	hypothetical protein, conserved	6.71313e-10	67.1639	10.6455	0.158501
Tb927.3.3270	ATP-dependent phosphofructokinase (TbPFK)	0	1182.58	187.751	0.158764
Tb927.4.2710	ubiquitin-conjugating enzyme e2, putative,ubiquitin carrier protein, putative,ubiquitin-protein ligase, putative	0	187.218	29.8927	0.159668
Tb927.5.4480	paraflagellar rod component par4, putative	0	139.361	22.2579	0.159714
Tb927.7.1790	Adenine phosphoribosyltransferase, putative	0	263.856	42.2765	0.160226
Tb927.1.4100	cytochrome oxidase subunit IV (COXIV)	0	112.554	18.0757	0.160596
Tb11.01.4810	hypothetical protein, conserved	0	444.894	71.6889	0.161137
Tb927.8.1790	hypothetical protein, conserved	0	235.794	38.0329	0.161297
Tb927.7.3580	protein kinase, putative	0	87.4919	14.1506	0.161736
Tb11.01.6590	zinc finger protein 2 (ZFP2)	0	746.604	120.82	0.161826
Tb11.01.2060	hypothetical protein, conserved	3.16021e-06	47.8256	7.74674	0.161979
Tb927.8.7970	hypothetical protein	0	318.625	52.1781	0.16376
Tb927.2.3320	65 kDa invariant surface glycoprotein (10C8.460)	0	249.709	40.8951	0.163771
Tb927.10.500	hypothetical protein	0.00178455	33.0886	5.42272	0.163885
Tb927.1.2720	hypothetical protein, unlikely	0.00525515	30.5433	5.00559	0.163885
Tb927.10.3960	hypothetical protein, conserved	0	98.2178	16.2682	0.165634
Tb927.8.7920	receptor-type adenylate cyclase GRESAG 4, putative	0.00667047	30.1581	4.99644	0.165675
Tb927.2.2490	hypothetical protein (25N14.20)	0	172.519	28.6602	0.166128
Tb927.2.3370	UDP-Gal or UDP-GlcNAc-dependent glycosyltransferase, putative (10C8.485)	0	160.721	26.7097	0.166187
Tb11.42.0006	histone H1, putative	9.11462e-08	57.2	9.5617	0.167162
Tb927.7.4110	kinesin, putative	0	91.2789	15.3672	0.168354
Tb927.1.4310	hypothetical protein, conserved	0	150.225	25.3821	0.16896
Tb927.7.6830	trans-sialidase, putative	0.00625881	30.6526	5.18398	0.169121
Tb927.2.510	retrotransposon hot spot protein 4 (RHS4), putative (3B10.210)	0	118.79	20.112	0.169307
Tb11.02.4730	DNA repair and recombination helicase protein PIF1, putative,DNA repair and recombination protein, mitochondrial precursor, putative (PIF1)	0	227.744	38.5831	0.169414
Tb927.7.4270	hypothetical protein, conserved	0	226.609	38.4206	0.169545
Tb927.8.7320	variant surface glycoprotein (VSG)-related, putative	3.95871e-05	43.1002	7.37011	0.171
Tb927.6.1300	hypothetical protein	0.000739579	36.0854	6.19739	0.171742
Tb11.01.6230	expression site-associated gene 2 (ESAG2) protein, putative	0	369.981	63.6088	0.171925
Tb927.1.4010	hypothetical protein, conserved	7.10918e-06	47.541	8.20902	0.172672
Tb11.39.0008	histone H1, putative	0	147.132	25.5691	0.173783
Tb927.5.1050	hypothetical protein	2.19309e-08	62.1142	10.8363	0.174458
Tb927.8.4190	hypothetical protein, conserved	0	278.383	48.8045	0.175314
Tb09.160.5470	hypothetical protein, unlikely	2.07777e-08	62.43	10.9468	0.175345
Tb09.160.1350	hypothetical protein, unlikely	9.83271e-06	47.3122	8.34265	0.176332
Tb927.4.5300	UDP-Gal or UDP-GlcNAc-dependent glycosyltransferase, putative	0	107.177	18.9178	0.17651
Tb927.7.5930	Protein Associated with Differentiation (TbPAD1)	0	403.869	71.4039	0.1768
Tb09.211.1020	phosphatidylcholine:ceramide cholinephosphotransferase 2, putative	0	119.098	21.1046	0.177204
Tb927.8.7330	hypothetical protein	6.75705e-07	54.1496	9.60551	0.177388
Tb927.10.12670	hypothetical protein, conserved	0	127.701	22.6603	0.177449
Tb927.3.4270	hypothetical protein, conserved	0	278.869	49.6857	0.178169
Tb927.6.4770	hypothetical protein, conserved	0	225.703	40.2462	0.178315
Tb11.03.0620	RNA-binding protein, UBP1 (UBP1)	0	813.746	146.283	0.179765
Tb927.10.890	kinesin, putative	1.19024e-09	70.7812	12.7894	0.180689
Tb927.1.480	leucine-rich repeat protein (LRRP), putative	2.57405e-10	75.0633	13.6826	0.182281
Tb927.1.4670	hypothetical protein, unlikely	0	212.725	39.0436	0.18354
Tb927.8.5050	hypothetical protein, conserved	0	132.392	24.2997	0.183543
Tb927.10.5960	hypothetical protein, conserved	0	97.0825	17.8242	0.183599
Tb927.5.1130	hypothetical protein, conserved	0	157.996	29.0189	0.183669
Tb927.1.3980	hypothetical protein, unlikely	2.76227e-08	63.4465	11.6548	0.183695
Tb927.8.4360	hypothetical protein, conserved	5.53936e-10	73.721	13.6251	0.18482
Tb927.8.1290	hypothetical protein, conserved	3.04377e-08	63.4633	11.738	0.184958
Tb927.3.4710	hypothetical protein, conserved	0	214.332	40.0856	0.187026
Tb927.3.1510	variant surface glycoprotein (VSG)-related, putative	0	96.4815	18.0856	0.187451
Tb927.2.2260	phosphatidylinositol kinase related protein, putative (25N14.135)	6.03584e-08	62.3827	11.7429	0.188239
Tb927.6.850	hypothetical protein, conserved	0	155.87	29.5288	0.189445
Tb11.02.2740	aspartate aminotransferase, mitochondrial	1.79154e-10	77.892	14.7823	0.189779
Tb927.1.4840	hypothetical protein, unlikely	8.3759e-07	55.9755	10.6585	0.190413
Tb927.6.1520	aquaporin 3, putative (AQP1)	0	437.232	83.4627	0.190889
Tb927.5.1410	64 kDa invariant surface glycoprotein (ISG64)	0	210.21	40.148	0.19099
Tb927.10.4410	hypothetical protein	8.58811e-06	50.3533	9.71864	0.193009
Tb927.7.7000	hypothetical protein, conserved	0	98.6041	19.1103	0.193808
Tb09.160.4770	protein kinase, putative	0	323.166	63.0887	0.195221
Tb11.02.0290	succinyl-coA:3-ketoacid-coenzyme A transferase, mitochondrial precursor, putative	0	528.061	103.299	0.19562
Tb09.211.2140	hypothetical protein, unlikely	0	734.377	143.765	0.195765
Tb11.02.0850	phospholipid-transporting ATPase 1-like protein, putative	5.02709e-05	46.1722	9.04552	0.195908
Tb11.01.0220	hypothetical protein, conserved	0	98.3665	19.2974	0.196179
Tb927.4.5310	serine/threonine-protein kinase a, putative,protein kinase, putative	0	271.295	53.4708	0.197095
Tb927.5.2480	hypothetical protein, conserved	0	206.414	40.6928	0.197142
Tb927.5.294b	hypothetical protein	4.11848e-12	89.7867	17.7471	0.197658
Tb927.4.4580	hypothetical protein, conserved	0	111.785	22.1511	0.198159
Tb11.02.0810	hypothetical protein, conserved	0	118.98	23.6628	0.19888
Tb927.7.5450	lipin, putative	9.2324e-08	63.5579	12.6597	0.199184
